# Supplementary material
Source: MDPI journal article supplement (https://www.mdpi.com/2673-7256/3/3/19)
Supplement: s1 [file s1 › photochem-2336686-supplementary.pdf]

## Supporting information

for

# Photodynamic Anticancer and Antibacterial Activities of Sn(IV) N-Confused *Meso*-tetra(methylthiophenyl)porphyrin

Somila Dingiswayo <sup>1</sup>, Balaji Babu <sup>1,2</sup>, Kristen Burgess <sup>1</sup>, John Mack <sup>1,\*</sup> and Tebello Nyokong <sup>1</sup>

<sup>1</sup> Institute for Nanotechnology Innovation, Rhodes University, Makhanda 6140, South Africa; j.mack@ru.ac.za

<sup>1,2</sup> Department of Chemistry, SRM University - AP, Amaravati, Andhra Pradesh, 522502, India

\* Correspondence: j.mack@ru.ac.za

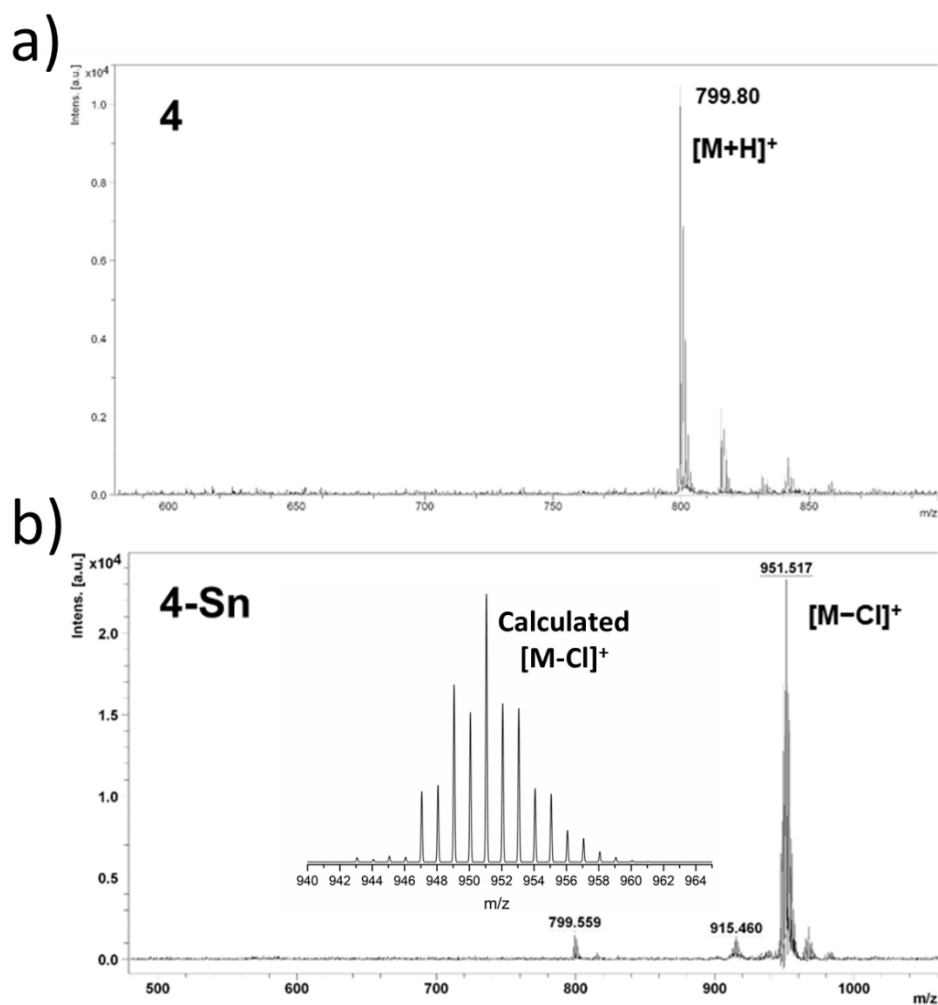

**Figure S1.** MALDI-TOF MS data for (a) **4** and (b) **4-Sn** (inset: calculated isotopic distribution pattern for  $[M-Cl]^+$ ).

# <sup>1</sup>H NMR 4

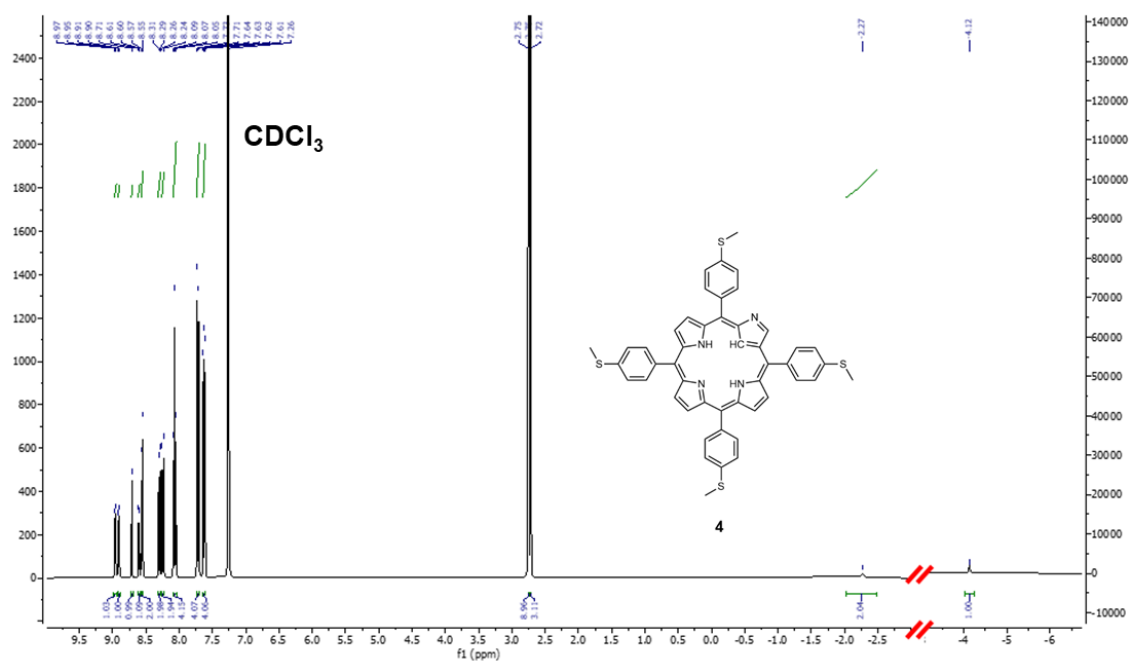

# <sup>1</sup>H NMR 4-Sn

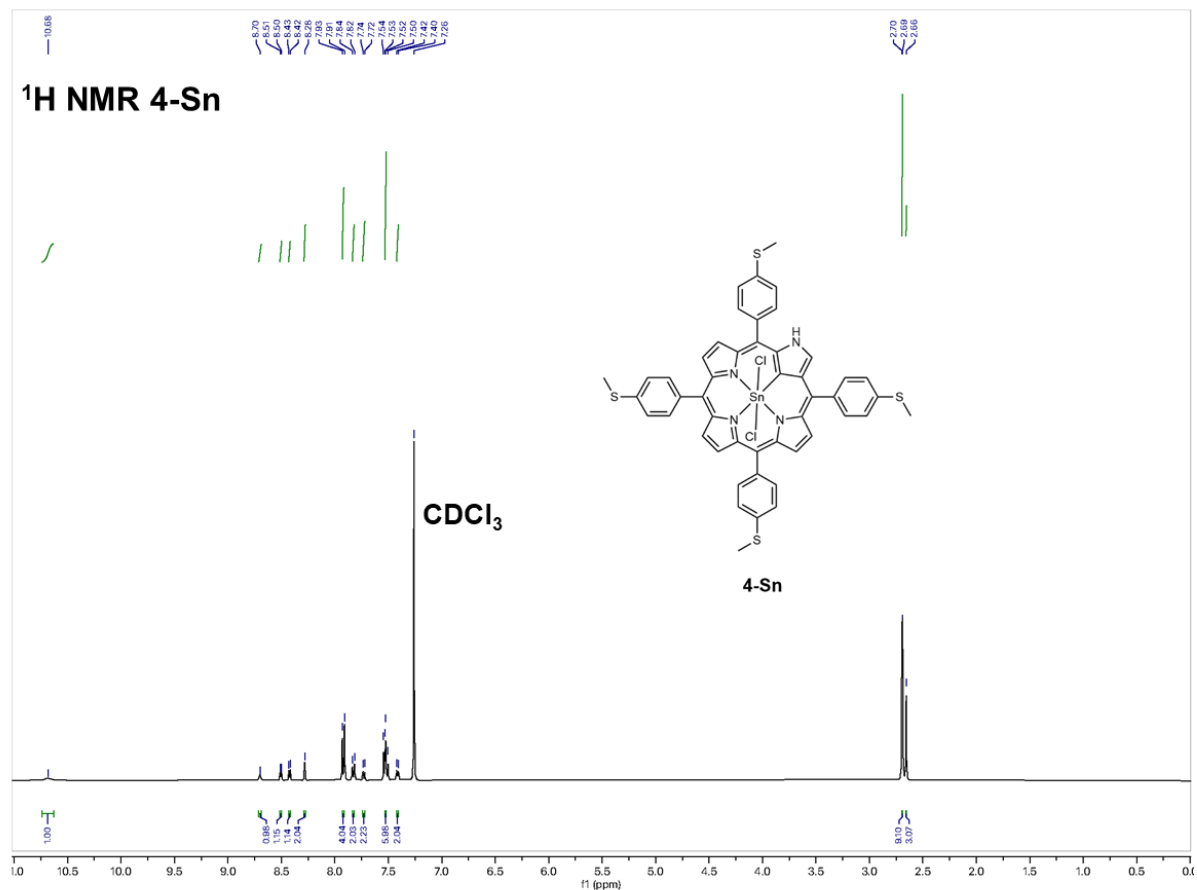

Figure S2. <sup>1</sup>H NMR spectra of (a) **4** and (b) **4-Sn** in CDCl<sub>3</sub>.

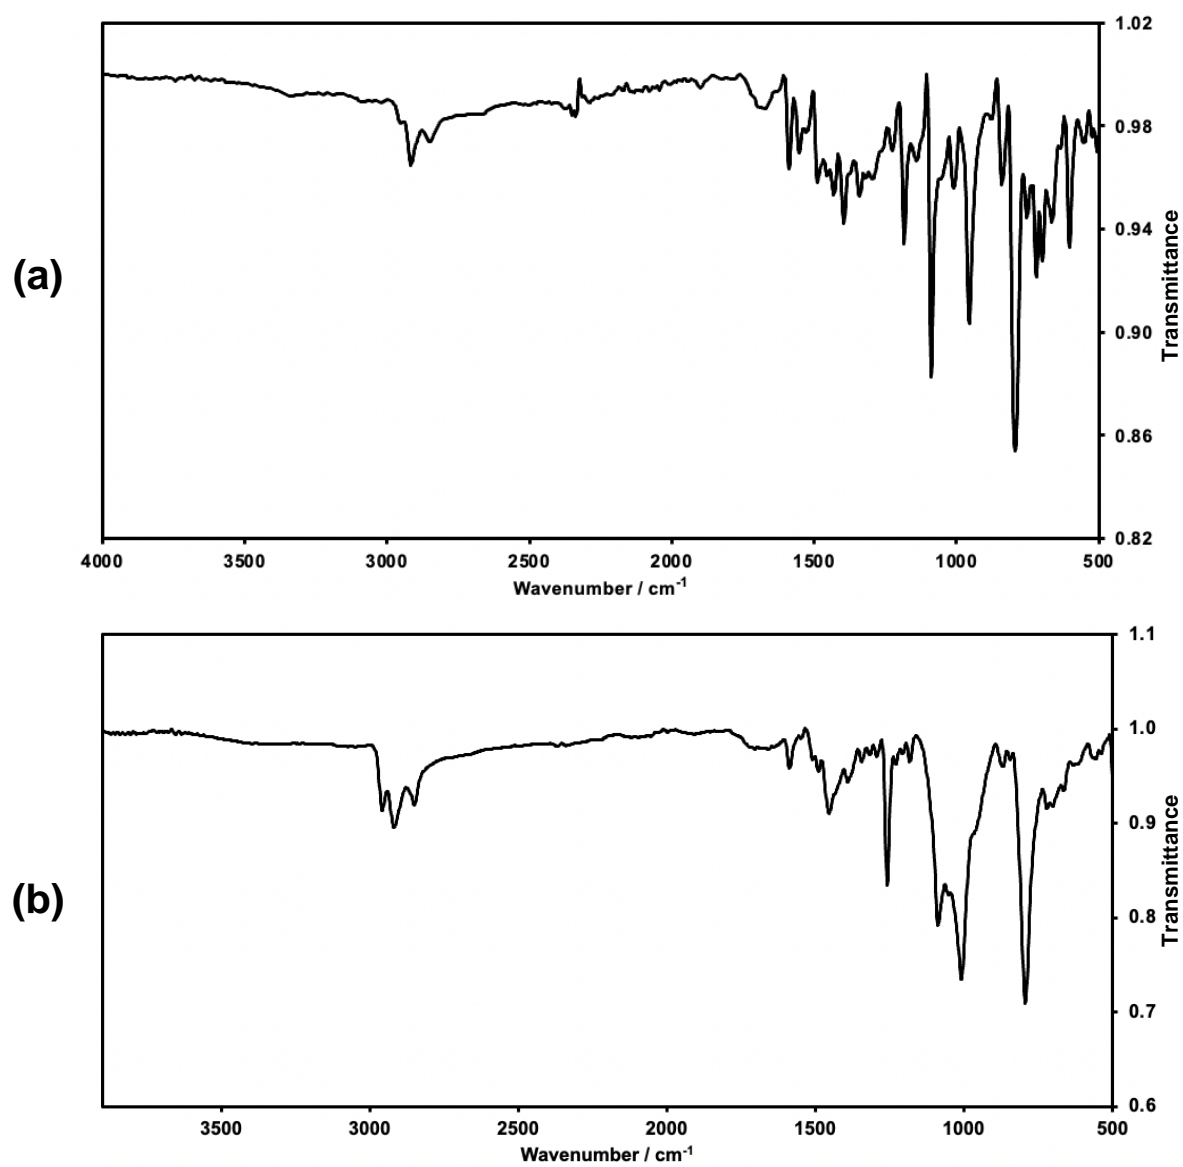

**Figure S3.** FTIR spectra of (a) **4** and (b) **4-Sn**.

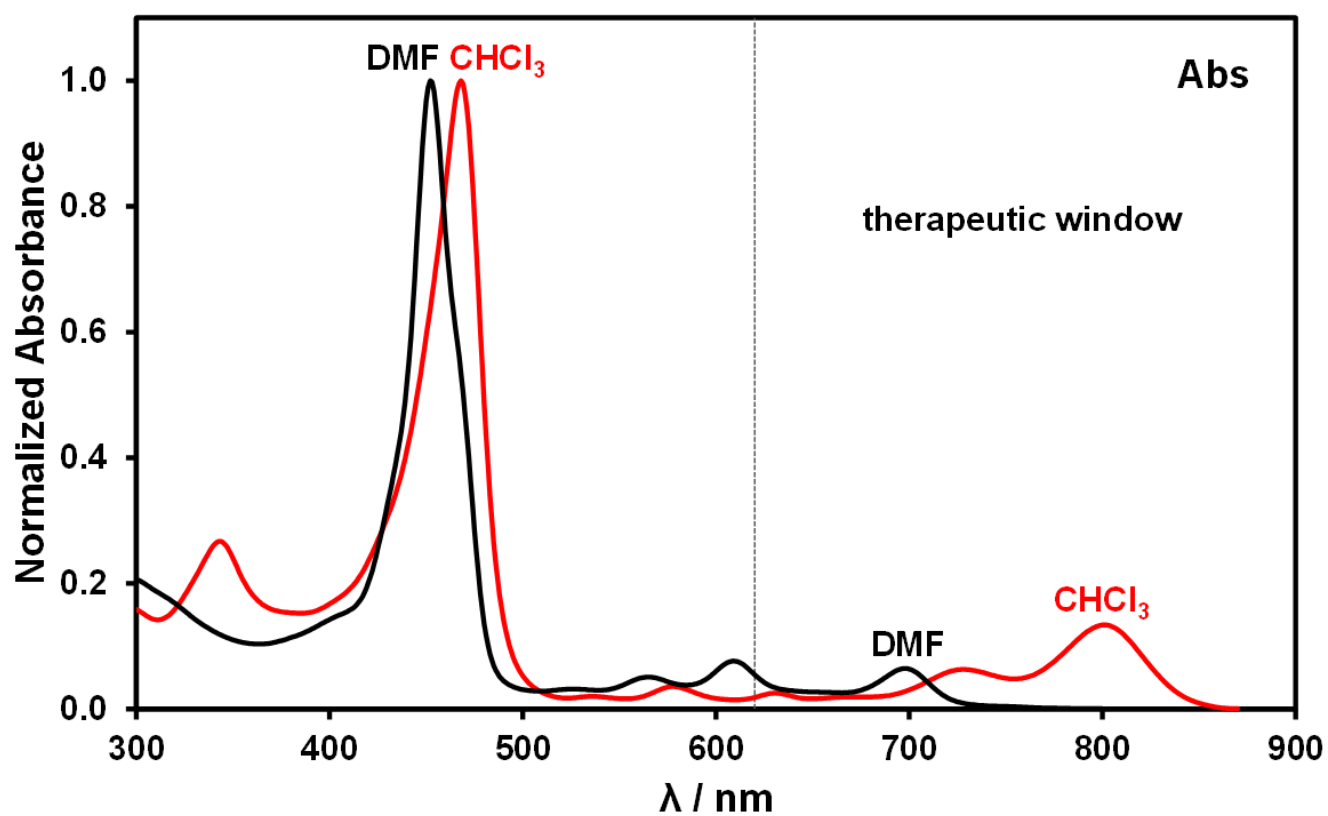

**Figure S4.** Normalised UV-visible absorption spectra of **4-Sn** in DMF and CHCl<sub>3</sub>.

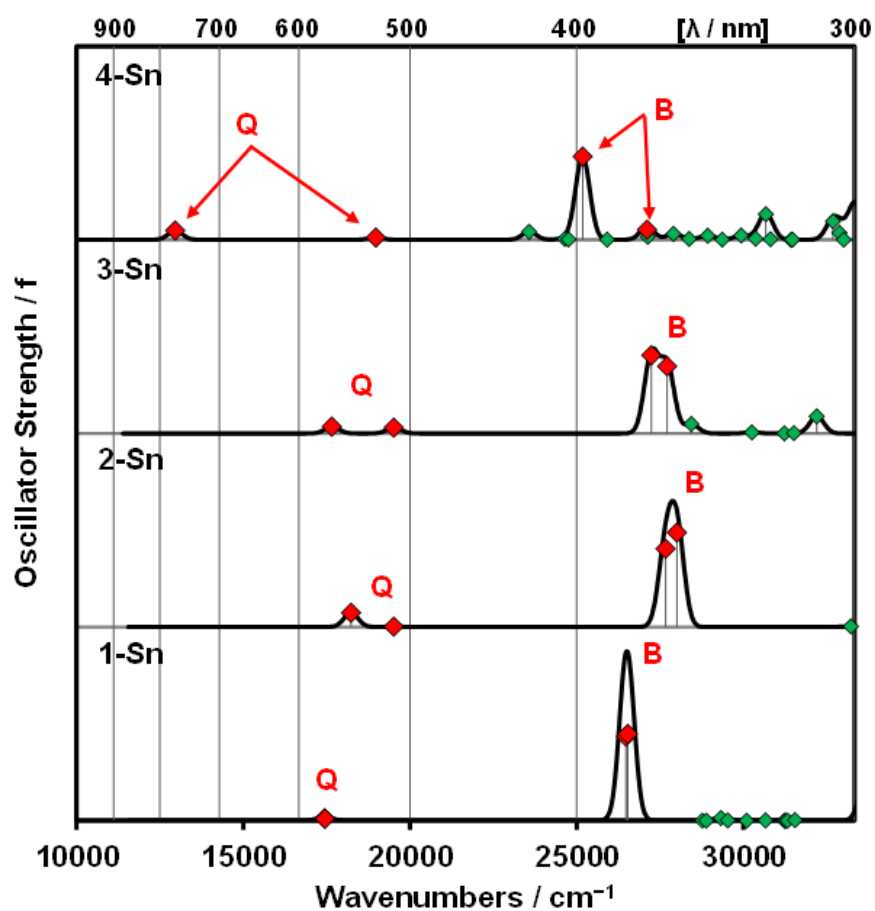

**Figure S5.** Calculated TD-DFT spectra for the B3LYP optimized geometries of **1-Sn**, **2-Sn**, **3-Sn** and **4-Sn** at the CAM-B3LYP/SDD level of theory. Red diamonds highlight the Q and B bands. Chemcraft was used to generate the simulated spectra at a bandwidth of 500  $\text{cm}^{-1}$ . Calculation details are provided in Table S1.

**Table S1.** TD-DFT spectra for the B3LYP/SDD optimised geometries of **1-Sn**, **2-Sn**, **3-Sn** and **4-Sn** calculated with the CAM-B3LYP functional and SDD basis sets.

| 1-Sn              |                |                  |                   |                                                            |
|-------------------|----------------|------------------|-------------------|------------------------------------------------------------|
| Band <sup>a</sup> | # <sup>b</sup> | Exp <sup>c</sup> | Calc <sup>d</sup> | Wavefunction <sup>e</sup>                                  |
| Q                 | 1              | 611              | 573 (0.04)        | <b>36% s → -a; 27% s → -s; 20% a → -s; 16% a → -a; ...</b> |
|                   | 2              |                  | 572 (0.04)        | <b>36% s → -s; 27% s → -a; 20% a → -a; 15% a → -s; ...</b> |
| B                 | 3              | 434              | 375 (1.43)        | <b>46% a → -a; 26% s → -s; 15% a → -s; 8% s → -a; ...</b>  |
|                   | 4              |                  | 374 (1.46)        | <b>47% a → -s; 26% s → -a; 15% a → -a; 8% s → -s; ...</b>  |
| 2-Sn              |                |                  |                   |                                                            |
| Band <sup>a</sup> | # <sup>b</sup> | Exp <sup>c</sup> | Calc <sup>d</sup> | Wavefunction <sup>e</sup>                                  |
| Q <sub>x</sub>    | 1              | 619              | 549 (0.21)        | <b>75% s → -a; 24% a → -s; ...</b>                         |
| Q <sub>y</sub>    | 2              | 568              | 513 (0.00)        | <b>59% a → -a; 39% s → -s; ...</b>                         |
| B                 | 3              | 431              | 362 (1.29)        | <b>60% s → -s; 38% a → -a; ...</b>                         |
|                   | 4              |                  | 357 (1.45)        | <b>73% a → -a; 23% s → -a; ...</b>                         |
| 3-Sn              |                |                  |                   |                                                            |
| Band <sup>a</sup> | # <sup>b</sup> | Exp <sup>c</sup> | Calc <sup>d</sup> | Wavefunction <sup>e</sup>                                  |
| Q <sub>x</sub>    | 1              | 633              | 588 (0.06)        | <b>68% a → -s; 32% s → -a; ...</b>                         |
| Q <sub>y</sub>    | 2              | 605              | 504 (0.08)        | <b>67% s → -s; 31% a → -a; ...</b>                         |
| B                 | 3              | 436              | 360 (1.38)        | <b>63% s → -a; 31% a → -s; ...</b>                         |
|                   | 4              |                  | 355 (1.73)        | <b>66% a → -a; 29% s → -s; ...</b>                         |
| 4-Sn              |                |                  |                   |                                                            |
| Band <sup>a</sup> | # <sup>b</sup> | Exp <sup>c</sup> | Calc <sup>d</sup> | Wavefunction <sup>e</sup>                                  |
| Q <sub>x</sub>    | 1              | 697              | 771 (0.14)        | <b>92% s → -a; 5% a → -s; ...</b>                          |
| Q <sub>y</sub>    | 2              | 609              | 527 (0.03)        | <b>67% s → -s; 31% a → -s; ...</b>                         |
| B                 | 6              | 452              | 397 (1.29)        | <b>59% a → -s; 27% s → -a; 10% H-6 → -s; ...</b>           |
|                   | 8              |                  | 370 (0.19)        | <b>69% a → -s; ...</b>                                     |

<sup>a</sup>Band assignment is rationalized in the main text. <sup>b</sup>The number of the state in ascending energy terms. <sup>c</sup>Experimental wavelengths of the bands (nm) in DMF from Table 1 in the main text for **1-Sn**, **2-Sn**, **3-Sn**, **4-Sn**. (f). <sup>d</sup>Calculated band energies (nm) with the oscillator strength (f) values in round brackets. <sup>e</sup>Wavefunctions derived from the eigenvectors predicted in the TD-DFT calculations. Bold face is used to highlight contributions from one-electron transitions between the **s**, **a**, **-s** and **-a** MOs. H and L denote the HOMO and LUMO, respectively. Only one-electron contributions > 10% are consistently provided.

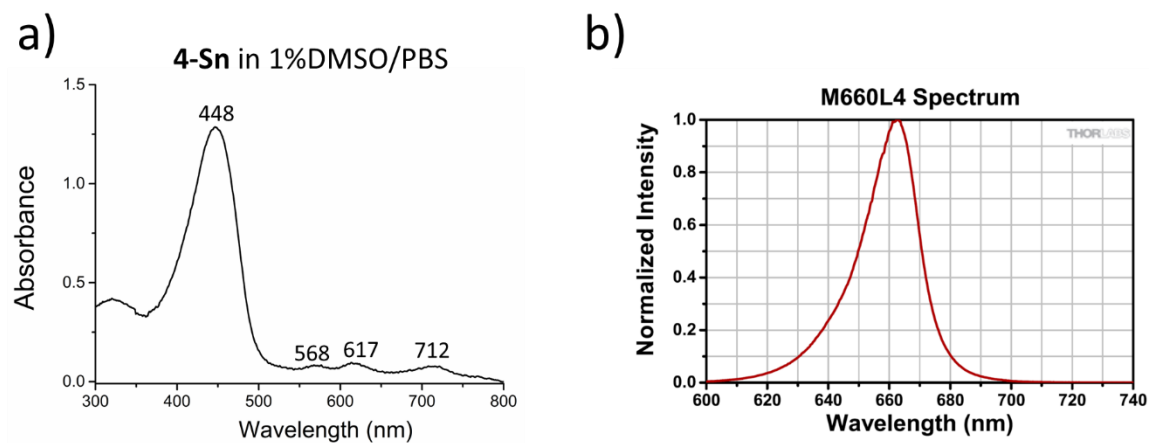

**Figure S6.** (a) Absorption spectra of **4-Sn** in 1% DMSO/PBS, (b) the emission profile of the Thorlabs M660L4 LED.
